# Supplementary material
Source: publisher site journal article supplement (https://www.spandidos-publications.com/2968/downloadSupplementary)
Supplement: Supplementary file 1 [file downloadSupplementary]

## Sheet: module1
The enriched GO terms and signaling pathways of Module 1 from the PPI network
Category	Term	Count	%	PValue	Genes	List Total	Pop Hits	Pop Total	Fold Enrichment	Bonferroni	Benjamini	FDR
GOTERM_BP_DIRECT	GO:0051301~cell division	32	40.5063	2.67526e-32	CKS1B, NEK2, AURKA, PTTG1, SPC25, KIF2C, CDCA8, CDCA7, NCAPG, OIP5, BUB1, FBXO5, SKA1, CCNA2, CDCA5, CDCA3, CDK1, KIF11, TPX2, CENPF, NDC80, BIRC5, CDC20, TACC3, UBE2C, MCM5, CCNB1, FAM64A, MAD2L1, CCNB2, ZWINT, KIF20B	78	350	16792	19.6829	1.23062e-29	1.23062e-29	3.8073e-29
GOTERM_BP_DIRECT	GO:0007067~mitotic nuclear division	28	35.443	1.98146e-30	NEK2, ANLN, AURKA, AURKB, PTTG1, CEP55, SPC25, KIF2C, OIP5, BUB1, FBXO5, SKA1, CCNA2, CDCA5, ASPM, CDCA3, CENPN, CDK1, KIF11, TPX2, CENPF, NDC80, BIRC5, CDC20, PBK, FAM64A, CCNB2, KIF20B	78	248	16792	24.306	9.11469e-28	4.55735e-28	2.81991e-27
GOTERM_CC_DIRECT	GO:0005654~nucleoplasm	49	62.0253	1.23658e-20	KIF23, PRC1, E2F7, AURKA, AURKB, MCM10, CDC45, CDCA8, CDCA7, MCM7, OIP5, CDCA5, CCNA2, TOP2A, CDK1, TPX2, DEPDC1, MCM2, UBE2C, MCM3, MCM5, MCM6, RFC4, RRM1, KPNA2, UBE2T, CKS1B, FOXM1, KIAA0101, ANLN, TYMS, HJURP, BUB1, FBXO5, FEN1, CENPN, GINS2, CENPM, RAD51AP1, CENPF, BIRC5, CDC20, RACGAP1, CENPK, CCNB1, CCNB2, KIF20B, PCNA, KIF20A	79	2784	18224	4.06016	1.47153e-18	1.47153e-18	1.41736e-17
REACTOME_PATHWAY	R-HSA-2500257:R-HSA-2500257	19	24.0506	1.35696e-20	CENPN, CDK1, CENPM, CENPF, BIRC5, NDC80, CDC20, AURKB, CENPK, CCNB1, KIF2C, SPC25, CDCA8, MAD2L1, CCNB2, ZWINT, BUB1, SKA1, CDCA5	59	121	9075	24.1525	1.45195e-18	1.45195e-18	1.5253e-17
GOTERM_BP_DIRECT	GO:0007062~sister chromatid cohesion	16	20.2532	5.74504e-19	CENPN, CENPM, CENPF, BIRC5, NDC80, CDC20, AURKB, CENPK, KIF2C, SPC25, CDCA8, MAD2L1, ZWINT, BUB1, SKA1, CDCA5	78	103	16792	33.4419	2.64272e-16	8.80906e-17	8.17606e-16
KEGG_PATHWAY	hsa04110:Cell cycle	16	20.2532	1.24847e-18	CDK1, TTK, CDC20, PTTG1, MCM2, MCM3, MCM5, MCM6, CCNB1, CDC45, MAD2L1, CCNB2, MCM7, PCNA, BUB1, CCNA2	33	124	6879	26.8974	4.11994e-17	4.11994e-17	1.08973e-15
GOTERM_CC_DIRECT	GO:0030496~midbody	15	18.9873	2.61553e-16	KIF23, CDK1, CDCA8, PRC1, NEK2, KIF20B, CENPF, BIRC5, AURKA, CEP55, AURKB, RACGAP1, ECT2, ASPM, KIF20A	79	129	18224	26.8237	2.64233e-14	1.32117e-14	2.55351e-13
REACTOME_PATHWAY	R-HSA-2467813:R-HSA-2467813	18	22.7848	7.89608e-16	CENPN, CENPM, CENPF, BIRC5, NDC80, CDC20, PTTG1, AURKB, UBE2C, CENPK, KIF2C, SPC25, CDCA8, MAD2L1, ZWINT, BUB1, SKA1, CDCA5	59	185	9075	14.9656	8.31557e-14	4.15223e-14	8.77076e-13
GOTERM_CC_DIRECT	GO:0005634~nucleus	58	73.4177	3.05467e-15	KIF23, PRC1, E2F7, AURKA, PTTG1, AURKB, MCM10, KIF2C, CDC45, CDCA8, MCM7, CDCA7, OIP5, TOP2A, CDCA5, CCNA2, ASPM, CDK1, TPX2, NUSAP1, DEPDC1, MCM2, PBK, MCM3, ECT2, MCM5, MCM6, UHRF1, MAD2L1, ZWINT, KPNA2, MELK, UBE2T, NEK2, FOXM1, KIAA0101, TYMS, SPC25, HJURP, NCAPG, FBXO5, FEN1, TRIP13, GINS2, RAD51AP1, DLGAP5, CENPF, NDC80, BIRC5, CDC20, CENPK, RACGAP1, CDKN3, CCNB1, FAM64A, CCNB2, KIF20B, PCNA	79	5415	18224	2.47085	3.69926e-13	1.23346e-13	3.56382e-12
REACTOME_PATHWAY	R-HSA-68877:R-HSA-68877	15	18.9873	3.1775e-15	CENPN, CENPM, CENPF, BIRC5, NDC80, CDC20, AURKB, CENPK, KIF2C, SPC25, CDCA8, MAD2L1, ZWINT, BUB1, SKA1	59	108	9075	21.363	3.44502e-13	1.14797e-13	3.61933e-12
GOTERM_MF_DIRECT	GO:0005515~protein binding	69	87.3418	1.90903e-14	KIF23, STIL, PRC1, E2F7, TTK, AURKA, PTTG1, AURKB, MCM10, KIF2C, CDCA8, CDC45, MCM7, OIP5, TOP2A, CDCA5, CCNA2, CDCA3, CDK1, TPX2, NUSAP1, DEPDC1, MCM2, PBK, MCM3, UBE2C, TACC3, ECT2, MCM5, MCM6, UHRF1, MAD2L1, RFC4, ZWINT, RRM1, KPNA2, MELK, CKS1B, NEK2, FOXM1, KIAA0101, CEP55, TK1, HMMR, SPC25, HJURP, NCAPG, BUB1, FBXO5, SKA1, FEN1, TRIP13, GINS2, RAD51AP1, DLGAP5, CENPF, NDC80, CDC20, BIRC5, C…	74	8785	16881	1.79173	2.61613e-12	2.61613e-12	2.24487e-11
GOTERM_BP_DIRECT	GO:0000082~G1/S transition of mitotic cell cycle	13	16.4557	3.43547e-14	TYMS, CDK1, CDC45, MCM7, PCNA, FBXO5, MCM2, MCM3, MCM10, CDKN3, CDCA5, MCM5, MCM6	78	102	16792	27.4379	1.57807e-11	3.94518e-12	4.88276e-11
REACTOME_PATHWAY	R-HSA-5663220:R-HSA-5663220	15	18.9873	7.62468e-14	CENPN, CENPM, CENPF, BIRC5, NDC80, CDC20, AURKB, CENPK, KIF2C, SPC25, CDCA8, MAD2L1, ZWINT, BUB1, SKA1	59	135	9075	17.0904	8.16114e-12	2.04026e-12	8.57314e-11
GOTERM_CC_DIRECT	GO:0000777~condensed chromosome kinetochore	12	15.1899	9.15708e-14	CENPN, KIF2C, SPC25, CENPM, MAD2L1, HJURP, NEK2, ZWINT, BUB1, BIRC5, NDC80, CENPK	79	87	18224	31.8184	1.08996e-11	2.72493e-12	1.04983e-10
GOTERM_CC_DIRECT	GO:0005819~spindle	13	16.4557	1.26326e-13	KIF23, KIF11, PRC1, TPX2, NUSAP1, CENPF, TTK, CDC20, AURKA, BIRC5, AURKB, FBXO5, KIF20A	79	121	18224	24.7842	1.50349e-11	3.00693e-12	1.44817e-10
GOTERM_BP_DIRECT	GO:0006260~DNA replication	14	17.7215	2.34461e-13	GINS2, CDK1, KIAA0101, MCM2, MCM10, MCM3, MCM5, MCM6, CDC45, RFC4, MCM7, RRM1, PCNA, FEN1	78	155	16792	19.4448	1.0786e-10	2.15721e-11	3.337e-10
GOTERM_CC_DIRECT	GO:0005813~centrosome	18	22.7848	2.29846e-12	KIF23, CKAP2, STIL, CDK1, NEK2, CENPF, AURKA, CDC20, CEP55, MCM3, CCNB1, CDC45, PLK4, CCNB2, NCAPG, CKAP2L, KIF20B, PCNA	79	426	18224	9.74719	2.73521e-10	4.55869e-11	2.63451e-09
GOTERM_BP_DIRECT	GO:0007059~chromosome segregation	10	12.6582	2.19526e-11	CENPN, SPC25, KIF11, HJURP, OIP5, NEK2, CENPF, NDC80, SKA1, TOP2A	78	68	16792	31.6591	1.00982e-08	1.68304e-09	3.1242e-08
GOTERM_CC_DIRECT	GO:0000922~spindle pole	11	13.9241	3.44842e-11	CKAP2, CCNB1, KIF11, MAD2L1, PRC1, NEK2, CKAP2L, TPX2, CENPF, CDC20, TACC3	79	109	18224	23.28	4.10362e-09	5.86231e-10	3.95255e-08
REACTOME_PATHWAY	R-HSA-176974:R-HSA-176974	7	8.86076	4.68808e-11	GINS2, CDC45, MCM7, MCM2, MCM3, MCM5, MCM6	59	12	9075	89.7246	5.01625e-09	1.00325e-09	5.26969e-08
GOTERM_BP_DIRECT	GO:0008283~cell proliferation	16	20.2532	9.26187e-11	STIL, CKS1B, CDK1, DLGAP5, TPX2, CENPF, AURKB, TACC3, MCM10, KIF2C, TYMS, UHRF1, MCM7, BUB1, PCNA, MELK	78	366	16792	9.41124	4.26046e-08	6.08637e-09	1.3181e-07
GOTERM_CC_DIRECT	GO:0000775~chromosome, centromeric region	9	11.3924	1.08747e-10	CENPN, KIF2C, CDCA8, HJURP, OIP5, CENPF, BIRC5, NDC80, CDCA5	79	57	18224	36.4237	1.29409e-08	1.61761e-09	1.24645e-07
GOTERM_CC_DIRECT	GO:0005829~cytosol	40	50.6329	1.67516e-10	KIF23, STIL, PRC1, NEK2, AURKA, AURKB, PTTG1, TK1, HMMR, TYMS, SPC25, KIF2C, CDCA8, MCM7, NCAPG, BUB1, FBXO5, SKA1, CDCA5, CDCA3, CDK1, CENPN, CENPM, KIF11, TPX2, CENPF, NDC80, CDC20, BIRC5, RACGAP1, CENPK, UBE2C, ECT2, CCNB1, PLK4, CCNB2, MAD2L1, ZWINT, RRM1, KPNA2	79	3315	18224	2.78351	1.99344e-08	2.21493e-09	1.92006e-07
KEGG_PATHWAY	hsa03030:DNA replication	8	10.1266	1.7764e-10	RFC4, MCM7, PCNA, MCM2, MCM3, MCM5, FEN1, MCM6	33	36	6879	46.3232	5.86214e-09	2.93107e-09	1.55054e-07
GOTERM_MF_DIRECT	GO:0005524~ATP binding	27	34.1772	2.44344e-10	KIF23, NEK2, TTK, AURKA, AURKB, TK1, KIF2C, MCM7, BUB1, TOP2A, TRIP13, CDK1, KIF11, TPX2, PBK, MCM2, UBE2C, MCM3, MCM5, MCM6, PLK4, RFC4, RRM1, KIF20B, MELK, UBE2T, KIF20A	74	1495	16881	4.11992	3.34752e-08	1.67376e-08	2.87206e-07
GOTERM_BP_DIRECT	GO:0000086~G2/M transition of mitotic cell cycle	11	13.9241	6.46604e-10	CCNB1, CDK1, PLK4, CCNB2, NEK2, FOXM1, TPX2, AURKA, BIRC5, MELK, HMMR	78	137	16792	17.2854	2.97438e-07	3.71797e-08	9.20215e-07
GOTERM_CC_DIRECT	GO:0005876~spindle microtubule	8	10.1266	6.74352e-10	CDK1, KIF11, PRC1, NUSAP1, AURKA, BIRC5, SKA1, AURKB	79	44	18224	41.9425	8.02479e-08	8.02479e-09	7.72938e-07
GOTERM_CC_DIRECT	GO:0000776~kinetochore	9	11.3924	1.94983e-09	KIF2C, MAD2L1, NEK2, ZWINT, BUB1, CENPF, TTK, NDC80, AURKB	79	81	18224	25.6315	2.32029e-07	2.10936e-08	2.23488e-06
REACTOME_PATHWAY	R-HSA-176187:R-HSA-176187	8	10.1266	2.66047e-09	CDC45, RFC4, MCM7, MCM2, MCM3, MCM10, MCM5, MCM6	59	37	9075	33.257	2.84671e-07	4.74451e-08	2.99053e-06
GOTERM_BP_DIRECT	GO:0000281~mitotic cytokinesis	7	8.86076	3.33018e-09	CKAP2, KIF23, NUSAP1, ANLN, CEP55, RACGAP1, KIF20A	78	29	16792	51.9646	1.53188e-06	1.70209e-07	4.73935e-06
GOTERM_BP_DIRECT	GO:0007052~mitotic spindle organization	7	8.86076	4.14764e-09	CCNB1, STIL, SPC25, KIF11, TTK, AURKA, NDC80	78	30	16792	50.2325	1.90791e-06	1.90792e-07	5.90272e-06
GOTERM_BP_DIRECT	GO:0006270~DNA replication initiation	7	8.86076	6.28415e-09	CDC45, MCM7, MCM2, MCM3, MCM10, MCM5, MCM6	78	32	16792	47.0929	2.89071e-06	2.62792e-07	8.9433e-06
REACTOME_PATHWAY	R-HSA-69052:R-HSA-69052	5	6.32911	2.23203e-08	MCM7, MCM2, MCM3, MCM5, MCM6	59	6	9075	128.178	2.38826e-06	3.41181e-07	2.50893e-05
KEGG_PATHWAY	hsa04114:Oocyte meiosis	9	11.3924	2.71792e-08	CCNB1, CDK1, MAD2L1, CCNB2, BUB1, FBXO5, AURKA, CDC20, PTTG1	33	111	6879	16.9017	8.96913e-07	2.98971e-07	2.37234e-05
GOTERM_CC_DIRECT	GO:0042555~MCM complex	5	6.32911	3.84887e-08	MCM7, MCM2, MCM3, MCM5, MCM6	79	9	18224	128.158	4.58014e-06	3.81679e-07	4.41155e-05
REACTOME_PATHWAY	R-HSA-68962:R-HSA-68962	7	8.86076	4.16634e-08	CDC45, MCM7, MCM2, MCM3, MCM10, MCM5, MCM6	59	32	9075	33.6467	4.45798e-06	5.57248e-07	4.68322e-05
REACTOME_PATHWAY	R-HSA-69300:R-HSA-69300	6	7.59494	5.21927e-08	MCM7, MCM2, MCM3, MCM10, MCM5, MCM6	59	17	9075	54.2871	5.5846e-06	6.20513e-07	5.86677e-05
GOTERM_BP_DIRECT	GO:0031145~anaphase-promoting complex-dependent catabolic process	8	10.1266	7.18226e-08	CCNB1, CDK1, MAD2L1, AURKA, CDC20, PTTG1, AURKB, UBE2C	78	79	16792	21.8007	3.30379e-05	2.7532e-06	0.000102214
REACTOME_PATHWAY	R-HSA-176408:R-HSA-176408	6	7.59494	3.46465e-07	CCNB1, CDK1, FBXO5, CDC20, UBE2C, CCNA2	59	24	9075	38.4534	3.70711e-05	3.70717e-06	0.000389447
GOTERM_BP_DIRECT	GO:0042787~protein ubiquitination involved in ubiquitin-dependent protein catabolic process	9	11.3924	4.88735e-07	CCNB1, CDK1, UHRF1, MAD2L1, AURKA, CDC20, PTTG1, AURKB, UBE2C	78	153	16792	12.6637	0.000224793	1.72935e-05	0.000695541
GOTERM_BP_DIRECT	GO:0007051~spindle organization	5	6.32911	7.13285e-07	KIF11, TTK, AURKA, AURKB, ASPM	78	16	16792	67.2756	0.000328057	2.34362e-05	0.00101511
GOTERM_CC_DIRECT	GO:0032133~chromosome passenger complex	4	5.06329	7.49642e-07	CDCA8, AURKA, BIRC5, AURKB	79	5	18224	184.547	8.92035e-05	6.86209e-06	0.000859231
GOTERM_CC_DIRECT	GO:0005874~microtubule	11	13.9241	8.18021e-07	KIF23, KIF2C, KIF11, NEK2, KIF20B, TPX2, NUSAP1, AURKA, BIRC5, RACGAP1, KIF20A	79	311	18224	8.15923	9.73398e-05	6.95316e-06	0.000937606
GOTERM_CC_DIRECT	GO:0072686~mitotic spindle	6	7.59494	8.37873e-07	KIF23, CDK1, MAD2L1, AURKA, RACGAP1, ECT2	79	41	18224	33.7586	9.9702e-05	6.64711e-06	0.00096036
GOTERM_CC_DIRECT	GO:0005737~cytoplasm	44	55.6962	8.39231e-07	STIL, PRC1, NEK2, FOXM1, KIAA0101, TTK, PTTG1, MCM10, TYMS, CDC45, MCM7, CDCA7, HJURP, NCAPG, OIP5, BUB1, FBXO5, TOP2A, CCNA2, CDCA5, ASPM, CKAP2, CDK1, KIF11, DLGAP5, CENPF, NUSAP1, CDC20, BIRC5, MCM2, RACGAP1, TACC3, CDKN3, UBE2C, ECT2, CCNB1, FAM64A, CKAP2L, ZWINT, RRM1, KIF20B, PCNA, KPNA2, UBE2T	79	5222	18224	1.94371	9.98636e-05	6.24177e-06	0.000961917
GOTERM_CC_DIRECT	GO:0051233~spindle midzone	5	6.32911	1.14611e-06	CDCA8, KIF20B, AURKA, AURKB, RACGAP1	79	19	18224	60.7062	0.000136377	8.02271e-06	0.00131365
GOTERM_CC_DIRECT	GO:0000784~nuclear chromosome, telomeric region	8	10.1266	1.38599e-06	CDK1, MCM7, PCNA, MCM2, MCM3, MCM5, FEN1, MCM6	79	130	18224	14.1959	0.000164919	9.16288e-06	0.0015886
REACTOME_PATHWAY	R-HSA-68867:R-HSA-68867	5	6.32911	1.94578e-06	MCM7, MCM2, MCM3, MCM5, MCM6	59	15	9075	51.2712	0.000208177	1.8927e-05	0.00218715
GOTERM_CC_DIRECT	GO:0015630~microtubule cytoskeleton	8	10.1266	1.97029e-06	CKAP2, KIF2C, CCNB2, PRC1, TPX2, AURKA, MCM2, TACC3	79	137	18224	13.4706	0.000234437	1.23402e-05	0.00225831
GOTERM_MF_DIRECT	GO:0008017~microtubule binding	9	11.3924	3.14157e-06	KIF23, KIF11, PRC1, KIF20B, NUSAP1, BIRC5, SKA1, RACGAP1, KIF20A	74	208	16881	9.87065	0.000430303	0.000143455	0.00369259
GOTERM_MF_DIRECT	GO:0003678~DNA helicase activity	5	6.32911	3.20266e-06	MCM7, MCM2, MCM3, MCM5, MCM6	74	24	16881	47.5253	0.000438669	0.000109685	0.0037644
REACTOME_PATHWAY	R-HSA-69205:R-HSA-69205	5	6.32911	3.36044e-06	CDK1, TYMS, CDC45, PCNA, FBXO5	59	17	9075	45.2393	0.000359503	2.99636e-05	0.00377728
REACTOME_PATHWAY	R-HSA-113510:R-HSA-113510	5	6.32911	3.36044e-06	CDK1, TYMS, CDC45, PCNA, FBXO5	59	17	9075	45.2393	0.000359503	2.99636e-05	0.00377728
GOTERM_BP_DIRECT	GO:0051439~regulation of ubiquitin-protein ligase activity involved in mitotic cell cycle	5	6.32911	3.3869e-06	CCNB1, CDK1, FBXO5, CDC20, UBE2C	78	23	16792	46.8004	0.00155676	0.00010386	0.00481996
GOTERM_BP_DIRECT	GO:0000083~regulation of transcription involved in G1/S transition of mitotic cell cycle	5	6.32911	3.3869e-06	CDK1, TYMS, CDC45, PCNA, FBXO5	78	23	16792	46.8004	0.00155676	0.00010386	0.00481996
GOTERM_MF_DIRECT	GO:0019901~protein kinase binding	11	13.9241	4.75427e-06	CCNB1, CKS1B, KIF11, PRC1, FOXM1, TPX2, FBXO5, AURKA, RACGAP1, CCNA2, KIF20A	74	376	16881	6.67377	0.000651124	0.000130259	0.0055881
GOTERM_BP_DIRECT	GO:0000070~mitotic sister chromatid segregation	5	6.32911	4.80488e-06	MAD2L1, NEK2, ZWINT, NUSAP1, NDC80	78	25	16792	43.0564	0.00220781	0.000138131	0.00683786
REACTOME_PATHWAY	R-HSA-176417:R-HSA-176417	4	5.06329	4.88864e-06	CCNB1, CDK1, FBXO5, CDC20	59	6	9075	102.542	0.000522949	4.02366e-05	0.00549499
GOTERM_BP_DIRECT	GO:0007049~cell cycle	9	11.3924	6.6911e-06	CKS1B, UHRF1, HJURP, FOXM1, AURKA, CDC20, MCM2, AURKB, CDKN3	78	217	16792	8.92875	0.00307318	0.000181037	0.00952202
REACTOME_PATHWAY	R-HSA-4615885:R-HSA-4615885	6	7.59494	8.98998e-06	CDCA8, PCNA, AURKA, BIRC5, AURKB, TOP2A	59	45	9075	20.5085	0.000961469	6.8707e-05	0.0101048
REACTOME_PATHWAY	R-HSA-69273:R-HSA-69273	5	6.32911	1.00852e-05	CCNB1, CDK1, CCNB2, FOXM1, CCNA2	59	22	9075	34.9576	0.00107854	7.19389e-05	0.0113358
GOTERM_BP_DIRECT	GO:0006268~DNA unwinding involved in DNA replication	4	5.06329	1.08707e-05	MCM7, MCM2, TOP2A, MCM6	78	10	16792	86.1128	0.00498805	0.000277769	0.0154695
GOTERM_MF_DIRECT	GO:0003688~DNA replication origin binding	4	5.06329	1.24871e-05	CDC45, MCM2, MCM10, MCM5	74	11	16881	82.9533	0.00170928	0.000285084	0.0146766
GOTERM_BP_DIRECT	GO:0051436~negative regulation of ubiquitin-protein ligase activity involved in mitotic cell cycle	6	7.59494	1.82735e-05	CCNB1, CDK1, MAD2L1, FBXO5, CDC20, UBE2C	78	71	16792	18.1928	0.00837065	0.000442317	0.0260028
GOTERM_BP_DIRECT	GO:0032467~positive regulation of cytokinesis	5	6.32911	2.40613e-05	KIF23, KIF20B, AURKB, RACGAP1, ECT2	78	37	16792	29.0922	0.0110073	0.000553262	0.0342374
GOTERM_BP_DIRECT	GO:0007080~mitotic metaphase plate congression	5	6.32911	2.40613e-05	CCNB1, KIF2C, CDCA8, CEP55, CDCA5	78	37	16792	29.0922	0.0110073	0.000553262	0.0342374
GOTERM_BP_DIRECT	GO:0051437~positive regulation of ubiquitin-protein ligase activity involved in regulation of mitotic cell cycle transition	6	7.59494	2.54711e-05	CCNB1, CDK1, MAD2L1, FBXO5, CDC20, UBE2C	78	76	16792	16.996	0.0116485	0.00055779	0.0362431
GOTERM_BP_DIRECT	GO:0007018~microtubule-based movement	6	7.59494	3.47e-05	KIF23, KIF2C, KIF11, KIF20B, RACGAP1, KIF20A	78	81	16792	15.9468	0.0158356	0.000725295	0.049372
REACTOME_PATHWAY	R-HSA-2514853:R-HSA-2514853	4	5.06329	3.94236e-05	CCNB1, CDK1, CCNB2, NCAPG	59	11	9075	55.9322	0.00420953	0.000263616	0.0443056
GOTERM_BP_DIRECT	GO:0034080~CENP-A containing nucleosome assembly	5	6.32911	4.40332e-05	CENPN, CENPM, HJURP, OIP5, CENPK	78	43	16792	25.0328	0.0200519	0.000880295	0.0626476
KEGG_PATHWAY	hsa04914:Progesterone-mediated oocyte maturation	6	7.59494	4.43522e-05	CCNB1, CDK1, MAD2L1, CCNB2, BUB1, CCNA2	33	87	6879	14.3762	0.00146259	0.000365847	0.0387063
REACTOME_PATHWAY	R-HSA-983189:R-HSA-983189	6	7.59494	4.73795e-05	KIF23, KIF2C, KIF11, KIF20B, RACGAP1, KIF20A	59	63	9075	14.6489	0.00505689	0.000298175	0.0532445
GOTERM_CC_DIRECT	GO:0097149~centralspindlin complex	3	3.79747	5.41045e-05	KIF23, RACGAP1, ECT2	79	3	18224	230.684	0.00641793	0.000321879	0.0619967
GOTERM_BP_DIRECT	GO:0000910~cytokinesis	5	6.32911	6.82325e-05	KIF23, PRC1, BIRC5, ECT2, KIF20A	78	48	16792	22.4252	0.0309005	0.00130698	0.0970614
GOTERM_CC_DIRECT	GO:0005871~kinesin complex	5	6.32911	7.75413e-05	KIF23, KIF2C, KIF11, KIF20B, KIF20A	79	53	18224	21.7626	0.00918533	0.000439321	0.0888413
GOTERM_MF_DIRECT	GO:0042802~identical protein binding	13	16.4557	8.12237e-05	PRC1, E2F7, BIRC5, NDC80, MCM10, TK1, MCM6, PLK4, UHRF1, MAD2L1, HJURP, PCNA, TRIP13	74	749	16881	3.95939	0.0110664	0.00158846	0.09543
REACTOME_PATHWAY	R-HSA-68949:R-HSA-68949	6	7.59494	8.44127e-05	MCM7, MCM2, MCM3, CCNA2, MCM5, MCM6	59	71	9075	12.9983	0.00899187	0.000501682	0.094844
GOTERM_BP_DIRECT	GO:0007094~mitotic spindle assembly checkpoint	4	5.06329	9.99144e-05	MAD2L1, BUB1, CENPF, TTK	78	20	16792	43.0564	0.0449226	0.00183683	0.142099
GOTERM_CC_DIRECT	GO:0000942~condensed nuclear chromosome outer kinetochore	3	3.79747	0.000107908	CCNB1, BUB1, NDC80	79	4	18224	173.013	0.0127597	0.000583547	0.123614
GOTERM_CC_DIRECT	GO:0005814~centriole	6	7.59494	0.000123461	STIL, PLK4, AURKA, BIRC5, CEP55, TOP2A	79	113	18224	12.2487	0.0145854	0.000638612	0.141419
REACTOME_PATHWAY	R-HSA-156711:R-HSA-156711	4	5.06329	0.000130794	CCNB1, CCNB2, FOXM1, CENPF	59	16	9075	38.4534	0.0138983	0.000736351	0.146921
GOTERM_BP_DIRECT	GO:0006977~DNA damage response, signal transduction by p53 class mediator resulting in cell cycle arrest	5	6.32911	0.000186348	CCNB1, CDK1, E2F7, PCNA, AURKA	78	62	16792	17.3615	0.0821564	0.00329181	0.264875
GOTERM_MF_DIRECT	GO:0004674~protein serine/threonine kinase activity	9	11.3924	0.000213846	CDK1, PLK4, NEK2, BUB1, TTK, AURKA, PBK, AURKB, MELK	74	376	16881	5.46036	0.028875	0.00365581	0.25107
REACTOME_PATHWAY	R-HSA-2565942:R-HSA-2565942	6	7.59494	0.00023384	CCNB1, CDK1, PLK4, CCNB2, NEK2, AURKA	59	88	9075	10.4873	0.0247133	0.00125041	0.262535
GOTERM_MF_DIRECT	GO:0003682~chromatin binding	9	11.3924	0.000278543	CDK1, CDC45, PCNA, KIAA0101, CENPF, CDCA5, TOP2A, UBE2T, MCM5	74	391	16881	5.25088	0.0374465	0.00423165	0.326914
GOTERM_BP_DIRECT	GO:0031536~positive regulation of exit from mitosis	3	3.79747	0.000307637	BIRC5, UBE2C, CDCA5	78	6	16792	107.641	0.131975	0.00522831	0.436924
GOTERM_CC_DIRECT	GO:0031298~replication fork protection complex	3	3.79747	0.00037454	GINS2, CDC45, MCM10	79	7	18224	98.8644	0.0435996	0.00185572	0.428455
REACTOME_PATHWAY	R-HSA-69478:R-HSA-69478	3	3.79747	0.000396541	CCNB1, CDK1, CCNB2	59	5	9075	92.2881	0.0415504	0.00201883	0.444832
GOTERM_MF_DIRECT	GO:0003777~microtubule motor activity	5	6.32911	0.000397101	KIF23, KIF2C, KIF11, KIF20B, KIF20A	74	80	16881	14.2576	0.0529597	0.00542658	0.465763
REACTOME_PATHWAY	R-HSA-174048:R-HSA-174048	4	5.06329	0.000400693	CCNB1, CDK1, CDC20, UBE2C	59	23	9075	26.7502	0.0419762	0.00194731	0.44948
GOTERM_BP_DIRECT	GO:0007093~mitotic cell cycle checkpoint	4	5.06329	0.000417847	MAD2L1, ZWINT, BUB1, TTK	78	32	16792	26.9103	0.174899	0.00684254	0.593018
GOTERM_BP_DIRECT	GO:0051988~regulation of attachment of spindle microtubules to kinetochore	3	3.79747	0.000429411	NEK2, RACGAP1, ECT2	78	7	16792	92.2637	0.179278	0.00678965	0.609383
REACTOME_PATHWAY	R-HSA-1538133:R-HSA-1538133	4	5.06329	0.00051568	CDK1, PCNA, CCNA2, TOP2A	59	25	9075	24.6102	0.0536965	0.00239677	0.578127
REACTOME_PATHWAY	R-HSA-179409:R-HSA-179409	4	5.06329	0.00051568	MAD2L1, NEK2, CDC20, UBE2C	59	25	9075	24.6102	0.0536965	0.00239677	0.578127
GOTERM_BP_DIRECT	GO:0051256~mitotic spindle midzone assembly	3	3.79747	0.000570845	KIF23, AURKB, RACGAP1	78	8	16792	80.7308	0.231	0.00871724	0.809338
GOTERM_BP_DIRECT	GO:0051983~regulation of chromosome segregation	3	3.79747	0.000570845	KIF2C, BUB1, AURKB	78	8	16792	80.7308	0.231	0.00871724	0.809338
GOTERM_BP_DIRECT	GO:0090307~mitotic spindle assembly	4	5.06329	0.000593625	KIF11, NEK2, TPX2, BIRC5	78	36	16792	23.9202	0.23902	0.00877254	0.841509
GOTERM_MF_DIRECT	GO:0003697~single-stranded DNA binding	5	6.32911	0.000702744	CDC45, MCM7, RAD51AP1, MCM10, MCM6	74	93	16881	12.2646	0.0918174	0.00871722	0.822903
GOTERM_BP_DIRECT	GO:0006281~DNA repair	7	8.86076	0.000729689	CDK1, UHRF1, RAD51AP1, FOXM1, PTTG1, UBE2T, FEN1	78	235	16792	6.41266	0.285219	0.0104383	1.03346
GOTERM_CC_DIRECT	GO:0031616~spindle pole centrosome	3	3.79747	0.000795922	DLGAP5, AURKA, AURKB	79	10	18224	69.2051	0.0904019	0.00378293	0.908492
REACTOME_PATHWAY	R-HSA-2980767:R-HSA-2980767	3	3.79747	0.000825907	CCNB1, CDK1, CCNB2	59	7	9075	65.9201	0.0846132	0.00367691	0.924453
GOTERM_CC_DIRECT	GO:0045171~intercellular bridge	4	5.06329	0.000880413	KIF23, CDCA8, CEP55, AURKB	79	44	18224	20.9712	0.0995091	0.00402324	1.00449
GOTERM_BP_DIRECT	GO:0034501~protein localization to kinetochore	3	3.79747	0.000911985	CDK1, TTK, AURKB	78	10	16792	64.5846	0.342759	0.0126378	1.29009
GOTERM_CC_DIRECT	GO:0032154~cleavage furrow	4	5.06329	0.00106803	PLK4, CEP55, RACGAP1, ECT2	79	47	18224	19.6326	0.11941	0.00469869	1.21735
GOTERM_BP_DIRECT	GO:0032508~DNA duplex unwinding	4	5.06329	0.00107252	GINS2, CDC45, MCM3, MCM5	78	44	16792	19.5711	0.389588	0.0144134	1.51557
REACTOME_PATHWAY	R-HSA-174178:R-HSA-174178	5	6.32911	0.00111851	AURKA, CDC20, PTTG1, AURKB, UBE2C	59	72	9075	10.6815	0.112856	0.00477845	1.2501
REACTOME_PATHWAY	R-HSA-174184:R-HSA-174184	5	6.32911	0.00111851	CDK1, MAD2L1, CDC20, UBE2C, CCNA2	59	72	9075	10.6815	0.112856	0.00477845	1.2501
GOTERM_CC_DIRECT	GO:0010369~chromocenter	3	3.79747	0.00116089	CDCA8, OIP5, AURKB	79	12	18224	57.6709	0.129098	0.00492447	1.32255
REACTOME_PATHWAY	R-HSA-606279:R-HSA-606279	5	6.32911	0.00123918	CENPN, CENPM, HJURP, OIP5, CENPK	59	74	9075	10.3928	0.12425	0.00508987	1.38411
GOTERM_BP_DIRECT	GO:0051310~metaphase plate congression	3	3.79747	0.00132965	KIF2C, CENPF, NDC80	78	12	16792	53.8205	0.457759	0.017335	1.87573
GOTERM_BP_DIRECT	GO:0016925~protein sumoylation	5	6.32911	0.00204802	CDCA8, PCNA, BIRC5, AURKB, TOP2A	78	117	16792	9.20009	0.610564	0.0258558	2.87548
GOTERM_BP_DIRECT	GO:0007076~mitotic chromosome condensation	3	3.79747	0.00209657	NCAPG, NUSAP1, CDCA5	78	15	16792	43.0564	0.619183	0.0257554	2.94271
GOTERM_BP_DIRECT	GO:0006271~DNA strand elongation involved in DNA replication	3	3.79747	0.00209657	GINS2, RFC4, PCNA	78	15	16792	43.0564	0.619183	0.0257554	2.94271
GOTERM_BP_DIRECT	GO:0051726~regulation of cell cycle	5	6.32911	0.00252985	CCNB1, CCNB2, FOXM1, KIAA0101, CENPF	78	124	16792	8.68073	0.688141	0.0301979	3.54071
GOTERM_BP_DIRECT	GO:0001556~oocyte maturation	3	3.79747	0.00302792	CCNB1, FBXO5, TRIP13	78	18	16792	35.8803	0.752156	0.035136	4.22392
GOTERM_MF_DIRECT	GO:0019899~enzyme binding	7	8.86076	0.00316211	RFC4, PCNA, BIRC5, CDC20, MCM2, MCM10, TOP2A	74	333	16881	4.79535	0.35202	0.0355121	3.65425
REACTOME_PATHWAY	R-HSA-162658:R-HSA-162658	3	3.79747	0.00347746	CCNB1, CDK1, CCNB2	59	14	9075	32.96	0.311153	0.0137102	3.84001
GOTERM_CC_DIRECT	GO:0005730~nucleolus	11	13.9241	0.00348439	TYMS, FAM64A, PLK4, CDCA8, HJURP, NEK2, KIF20B, NUSAP1, MCM10, TOP2A, FEN1	79	857	18224	2.96093	0.339902	0.0142209	3.92178
GOTERM_MF_DIRECT	GO:0004672~protein kinase activity	7	8.86076	0.00456264	CDK1, NEK2, BUB1, AURKA, PBK, AURKB, MELK	74	359	16881	4.44805	0.465547	0.0470504	5.23336
GOTERM_BP_DIRECT	GO:0007088~regulation of mitotic nuclear division	3	3.79747	0.00536585	NEK2, KIF20B, FBXO5	78	24	16792	26.9103	0.915832	0.0599981	7.37117
GOTERM_BP_DIRECT	GO:0071897~DNA biosynthetic process	3	3.79747	0.00628118	TYMS, CENPF, TK1	78	26	16792	24.8402	0.944892	0.0682531	8.57696
GOTERM_BP_DIRECT	GO:0006890~retrograde vesicle-mediated transport, Golgi to ER	4	5.06329	0.00633231	KIF23, KIF2C, KIF11, RACGAP1	78	82	16792	10.5016	0.946181	0.0672093	8.64389
REACTOME_PATHWAY	R-HSA-176412:R-HSA-176412	3	3.79747	0.00640204	CCNB1, CDK1, UBE2C	59	19	9075	24.2864	0.497028	0.0242448	6.96497
GOTERM_CC_DIRECT	GO:0000785~chromatin	4	5.06329	0.00657847	MCM7, OIP5, CENPF, MCM2	79	89	18224	10.3678	0.544074	0.0258411	7.28604
GOTERM_MF_DIRECT	GO:0004712~protein serine/threonine/tyrosine kinase activity	3	3.79747	0.00694408	TTK, AURKA, AURKB	74	29	16881	23.5988	0.615056	0.0659168	7.86419
REACTOME_PATHWAY	R-HSA-141430:R-HSA-141430	3	3.79747	0.00708432	MAD2L1, CDC20, UBE2C	59	20	9075	23.072	0.53267	0.0258907	7.68056
REACTOME_PATHWAY	R-HSA-176409:R-HSA-176409	3	3.79747	0.00708432	MAD2L1, CDC20, UBE2C	59	20	9075	23.072	0.53267	0.0258907	7.68056
GOTERM_BP_DIRECT	GO:0045931~positive regulation of mitotic cell cycle	3	3.79747	0.0072624	CCNB1, CDK1, BIRC5	78	28	16792	23.0659	0.965017	0.0750118	9.85333
REACTOME_PATHWAY	R-HSA-2132295:R-HSA-2132295	5	6.32911	0.00754188	KIF23, KIF2C, KIF11, RACGAP1, KIF20A	59	122	9075	6.30383	0.555159	0.02664	8.15764
GOTERM_BP_DIRECT	GO:0097421~liver regeneration	3	3.79747	0.00777733	TYMS, PCNA, AURKA	78	29	16792	22.2706	0.972445	0.0783837	10.5165
REACTOME_PATHWAY	R-HSA-5651801:R-HSA-5651801	3	3.79747	0.00779808	RFC4, PCNA, FEN1	59	21	9075	21.9734	0.56728	0.0266596	8.42379
GOTERM_BP_DIRECT	GO:0046777~protein autophosphorylation	5	6.32911	0.00805284	NEK2, TTK, AURKA, AURKB, MELK	78	172	16792	6.2582	0.975749	0.0793278	10.8695
GOTERM_BP_DIRECT	GO:0019886~antigen processing and presentation of exogenous peptide antigen via MHC class II	4	5.06329	0.00869129	KIF23, KIF2C, KIF11, RACGAP1	78	92	16792	9.36009	0.981965	0.0835913	11.6824
GOTERM_BP_DIRECT	GO:0000915~actomyosin contractile ring assembly	2	2.53165	0.00915028	KIF23, RACGAP1	78	2	16792	215.282	0.985426	0.0860397	12.2626
GOTERM_BP_DIRECT	GO:0007057~spindle assembly involved in female meiosis I	2	2.53165	0.00915028	FBXO5, AURKA	78	2	16792	215.282	0.985426	0.0860397	12.2626
GOTERM_BP_DIRECT	GO:0000022~mitotic spindle elongation	2	2.53165	0.00915028	KIF23, PRC1	78	2	16792	215.282	0.985426	0.0860397	12.2626
GOTERM_BP_DIRECT	GO:0000722~telomere maintenance via recombination	3	3.79747	0.00941753	RFC4, PCNA, FEN1	78	32	16792	20.1827	0.987127	0.0866891	12.5988
GOTERM_MF_DIRECT	GO:0004693~cyclin-dependent protein serine/threonine kinase activity	3	3.79747	0.00946255	CCNB1, CDK1, CCNB2	74	34	16881	20.1284	0.72816	0.0831727	10.5736
GOTERM_BP_DIRECT	GO:0019985~translesion synthesis	3	3.79747	0.0118214	RFC4, PCNA, KIAA0101	78	36	16792	17.9402	0.99579	0.105632	15.5693
REACTOME_PATHWAY	R-HSA-141405:R-HSA-141405	2	2.53165	0.0127422	MAD2L1, CDC20	59	2	9075	153.814	0.746446	0.0419742	13.4243
GOTERM_BP_DIRECT	GO:0007346~regulation of mitotic cell cycle	3	3.79747	0.0144645	CKS1B, FBXO5, BIRC5	78	40	16792	16.1462	0.998772	0.12545	18.7269
GOTERM_BP_DIRECT	GO:0006915~apoptotic process	8	10.1266	0.0151204	CKAP2, CDK1, CDCA7, BUB1, TPX2, BIRC5, MCM2, MELK	78	567	16792	3.03749	0.999096	0.128397	19.4933
GOTERM_BP_DIRECT	GO:0006974~cellular response to DNA damage stimulus	5	6.32911	0.0153239	MCM7, KIAA0101, MCM10, TOP2A, UBE2T	78	208	16792	5.17505	0.999178	0.127687	19.7297
GOTERM_MF_DIRECT	GO:0042393~histone binding	4	5.06329	0.0158695	CKS1B, UHRF1, HJURP, MCM2	74	122	16881	7.4794	0.888258	0.128006	17.1409
GOTERM_CC_DIRECT	GO:0048471~perinuclear region of cytoplasm	8	10.1266	0.0169106	MAD2L1, KIF20B, KIAA0101, CENPF, AURKA, CDC20, MCM3, CDKN3	79	621	18224	2.97177	0.868608	0.0633728	17.7565
GOTERM_CC_DIRECT	GO:0031262~Ndc80 complex	2	2.53165	0.0170121	SPC25, NDC80	79	4	18224	115.342	0.870212	0.0618148	17.8537
GOTERM_MF_DIRECT	GO:0035173~histone kinase activity	2	2.53165	0.0171872	CCNB1, CDK1	74	4	16881	114.061	0.906996	0.130392	18.4356
GOTERM_BP_DIRECT	GO:0034644~cellular response to UV	3	3.79747	0.0173376	PCNA, PBK, AURKB	78	44	16792	14.6783	0.999679	0.140837	22.0345
GOTERM_BP_DIRECT	GO:0007077~mitotic nuclear envelope disassembly	3	3.79747	0.0173376	CCNB1, CDK1, CCNB2	78	44	16792	14.6783	0.999679	0.140837	22.0345
REACTOME_PATHWAY	R-HSA-5656169:R-HSA-5656169	3	3.79747	0.0176101	RFC4, PCNA, KIAA0101	59	32	9075	14.42	0.850591	0.0559801	18.1033
GOTERM_BP_DIRECT	GO:0006468~protein phosphorylation	7	8.86076	0.0181915	PLK4, NEK2, BUB1, AURKA, BIRC5, PBK, AURKB	78	456	16792	3.30477	0.999785	0.144776	22.9932
GOTERM_BP_DIRECT	GO:0031577~spindle checkpoint	2	2.53165	0.0182179	BIRC5, AURKB	78	4	16792	107.641	0.999788	0.142533	23.0227
GOTERM_BP_DIRECT	GO:0046602~regulation of mitotic centrosome separation	2	2.53165	0.0182179	KIF11, NEK2	78	4	16792	107.641	0.999788	0.142533	23.0227
REACTOME_PATHWAY	R-HSA-170145:R-HSA-170145	2	2.53165	0.0190534	CDK1, CCNA2	59	3	9075	102.542	0.87234	0.0587445	19.4456
GOTERM_BP_DIRECT	GO:1901796~regulation of signal transduction by p53 class mediator	4	5.06329	0.0193451	RFC4, TPX2, AURKA, AURKB	78	124	16792	6.94458	0.999875	0.148251	24.2709
GOTERM_CC_DIRECT	GO:0005881~cytoplasmic microtubule	3	3.79747	0.0201383	CKAP2, KIF2C, BIRC5	79	51	18224	13.5696	0.91116	0.0707347	20.7989
REACTOME_PATHWAY	R-HSA-3301854:R-HSA-3301854	3	3.79747	0.0208688	CCNB1, CDK1, CCNB2	59	35	9075	13.184	0.895293	0.0624396	21.1057
GOTERM_MF_DIRECT	GO:0035174~histone serine kinase activity	2	2.53165	0.0214383	AURKA, AURKB	74	5	16881	91.2486	0.948644	0.152058	22.4874
GOTERM_CC_DIRECT	GO:0016020~membrane	17	21.519	0.0225774	CDK1, KIF11, TTK, NDC80, CEP55, MCM3, MCM5, HMMR, CCNB1, KIF2C, MCM7, CCNB2, NCAPG, BUB1, KPNA2, MELK, FEN1	79	2200	18224	1.78255	0.933961	0.076816	23.0294
GOTERM_BP_DIRECT	GO:0007100~mitotic centrosome separation	2	2.53165	0.022721	KIF11, AURKA	78	5	16792	86.1128	0.999974	0.169292	27.8977
GOTERM_BP_DIRECT	GO:0009157~deoxyribonucleoside monophosphate biosynthetic process	2	2.53165	0.022721	TYMS, TK1	78	5	16792	86.1128	0.999974	0.169292	27.8977
GOTERM_BP_DIRECT	GO:0000727~double-strand break repair via break-induced replication	2	2.53165	0.022721	GINS2, CDC45	78	5	16792	86.1128	0.999974	0.169292	27.8977
REACTOME_PATHWAY	R-HSA-68884:R-HSA-68884	2	2.53165	0.0253248	KIF23, KIF20A	59	4	9075	76.9068	0.93573	0.0734067	25.0488
GOTERM_CC_DIRECT	GO:0005663~DNA replication factor C complex	2	2.53165	0.0254106	RFC4, PCNA	79	6	18224	76.8945	0.95325	0.0837929	25.5483
GOTERM_CC_DIRECT	GO:0070938~contractile ring	2	2.53165	0.0254106	PRC1, KIF20B	79	6	18224	76.8945	0.95325	0.0837929	25.5483
GOTERM_BP_DIRECT	GO:0032873~negative regulation of stress-activated MAPK cascade	2	2.53165	0.0272036	FOXM1, PBK	78	6	16792	71.7607	0.999997	0.196471	32.4642
GOTERM_BP_DIRECT	GO:0070301~cellular response to hydrogen peroxide	3	3.79747	0.0281555	CDK1, PCNA, ECT2	78	57	16792	11.3306	0.999998	0.199619	33.3986
GOTERM_CC_DIRECT	GO:0043203~axon hillock	2	2.53165	0.0295833	TPX2, AURKA	79	7	18224	65.9096	0.971944	0.0944973	29.1212
GOTERM_CC_DIRECT	GO:0045120~pronucleus	2	2.53165	0.0295833	CENPF, AURKA	79	7	18224	65.9096	0.971944	0.0944973	29.1212
GOTERM_MF_DIRECT	GO:0043138~3'-5' DNA helicase activity	2	2.53165	0.0298861	GINS2, CDC45	74	7	16881	65.1776	0.984343	0.196502	29.9977
REACTOME_PATHWAY	R-HSA-157881:R-HSA-157881	2	2.53165	0.0315569	CDK1, CCNB2	59	5	9075	61.5254	0.967646	0.0885606	30.2628
GOTERM_BP_DIRECT	GO:0090267~positive regulation of mitotic cell cycle spindle assembly checkpoint	2	2.53165	0.031666	MAD2L1, NDC80	78	7	16792	61.5092	1	0.218625	36.7417
GOTERM_BP_DIRECT	GO:0032466~negative regulation of cytokinesis	2	2.53165	0.031666	E2F7, AURKB	78	7	16792	61.5092	1	0.218625	36.7417
GOTERM_CC_DIRECT	GO:0000940~condensed chromosome outer kinetochore	2	2.53165	0.0337384	CENPF, SKA1	79	8	18224	57.6709	0.983163	0.104509	32.5228
GOTERM_BP_DIRECT	GO:0060236~regulation of mitotic spindle organization	2	2.53165	0.0361082	TPX2, TACC3	78	8	16792	53.8205	1	0.242195	40.7486
GOTERM_BP_DIRECT	GO:0051315~attachment of mitotic spindle microtubules to kinetochore	2	2.53165	0.0361082	KIF2C, NDC80	78	8	16792	53.8205	1	0.242195	40.7486
GOTERM_BP_DIRECT	GO:0006302~double-strand break repair	3	3.79747	0.0368581	CDCA5, FEN1, TRIP13	78	66	16792	9.78555	1	0.24318	41.4013
REACTOME_PATHWAY	R-HSA-5685942:R-HSA-5685942	3	3.79747	0.0375333	RFC4, RAD51AP1, PCNA	59	48	9075	9.61335	0.983317	0.102121	34.9503
GOTERM_CC_DIRECT	GO:0072687~meiotic spindle	2	2.53165	0.0378759	AURKA, ASPM	79	9	18224	51.263	0.989896	0.113892	35.7614
GOTERM_MF_DIRECT	GO:0042803~protein homodimerization activity	8	10.1266	0.0380563	TYMS, MAD2L1, KIF20B, CENPF, TTK, BIRC5, ECT2, TOP2A	74	730	16881	2.49996	0.995085	0.233389	36.6221
KEGG_PATHWAY	hsa04115:p53 signaling pathway	3	3.79747	0.0384229	CCNB1, CDK1, CCNB2	33	67	6879	9.33379	0.725542	0.227862	28.9643
GOTERM_BP_DIRECT	GO:0008608~attachment of spindle microtubules to kinetochore	2	2.53165	0.0405302	NDC80, AURKB	78	9	16792	47.8405	1	0.260735	44.5019
GOTERM_BP_DIRECT	GO:1904668~positive regulation of ubiquitin protein ligase activity	2	2.53165	0.0405302	CDC20, UBE2C	78	9	16792	47.8405	1	0.260735	44.5019
GOTERM_CC_DIRECT	GO:0097431~mitotic spindle pole	2	2.53165	0.0419959	KIF20B, ASPM	79	10	18224	46.1367	0.993937	0.122703	38.8447
GOTERM_CC_DIRECT	GO:0000780~condensed nuclear chromosome, centromeric region	2	2.53165	0.0419959	AURKA, AURKB	79	10	18224	46.1367	0.993937	0.122703	38.8447
GOTERM_BP_DIRECT	GO:0000226~microtubule cytoskeleton organization	3	3.79747	0.0420824	CDK1, BIRC5, TACC3	78	71	16792	9.09642	1	0.265831	45.766
GOTERM_MF_DIRECT	GO:0016887~ATPase activity	4	5.06329	0.0448808	KIF23, KIF2C, KIF20B, KIF20A	74	183	16881	4.98626	0.998147	0.258862	41.7101
GOTERM_BP_DIRECT	GO:0055015~ventricular cardiac muscle cell development	2	2.53165	0.0449322	CCNB1, CDK1	78	10	16792	43.0564	1	0.277723	48.0176
GOTERM_BP_DIRECT	GO:0042493~response to drug	5	6.32911	0.050994	CCNB1, CDK1, TYMS, MCM7, CENPF	78	304	16792	3.54082	1	0.305661	52.5209
GOTERM_BP_DIRECT	GO:0060707~trophoblast giant cell differentiation	2	2.53165	0.0536766	PLK4, E2F7	78	12	16792	35.8803	1	0.315307	54.3956
REACTOME_PATHWAY	R-HSA-113507:R-HSA-113507	2	2.53165	0.0621346	CCNB1, CDK1	59	10	9075	30.7627	0.998955	0.161381	51.3769
REACTOME_PATHWAY	R-HSA-174437:R-HSA-174437	2	2.53165	0.0621346	PCNA, FEN1	59	10	9075	30.7627	0.998955	0.161381	51.3769
REACTOME_PATHWAY	R-HSA-2465910:R-HSA-2465910	2	2.53165	0.0621346	CCNB1, CDK1	59	10	9075	30.7627	0.998955	0.161381	51.3769
GOTERM_BP_DIRECT	GO:0008284~positive regulation of cell proliferation	6	7.59494	0.0627137	PRC1, FOXM1, KIF20B, TTK, BIRC5, CDC20	78	466	16792	2.77187	1	0.354756	60.2168
GOTERM_BP_DIRECT	GO:0043161~proteasome-mediated ubiquitin-dependent protein catabolic process	4	5.06329	0.0664965	CDK1, MAD2L1, CDC20, UBE2C	78	203	16792	4.24201	1	0.367918	62.4418
GOTERM_BP_DIRECT	GO:0007095~mitotic G2 DNA damage checkpoint	2	2.53165	0.0666451	CDK1, CCNA2	78	15	16792	28.7043	1	0.364428	62.5268
GOTERM_MF_DIRECT	GO:0048037~cofactor binding	2	2.53165	0.0670197	TYMS, BIRC5	74	16	16881	28.5152	0.999925	0.350786	55.7538
REACTOME_PATHWAY	R-HSA-174154:R-HSA-174154	3	3.79747	0.0681581	CDC20, PTTG1, UBE2C	59	67	9075	6.88717	0.999476	0.172076	54.774
GOTERM_CC_DIRECT	GO:0005657~replication fork	2	2.53165	0.0703522	UHRF1, PCNA	79	17	18224	27.1392	0.99983	0.19509	56.662
GOTERM_BP_DIRECT	GO:1904355~positive regulation of telomere capping	2	2.53165	0.0709288	NEK2, AURKB	78	16	16792	26.9103	1	0.37914	64.9015
GOTERM_MF_DIRECT	GO:0008574~ATP-dependent microtubule motor activity, plus-end-directed	2	2.53165	0.071058	KIF11, KIF20B	74	17	16881	26.8378	0.999959	0.355351	57.9532
GOTERM_MF_DIRECT	GO:0042826~histone deacetylase binding	3	3.79747	0.0720653	CDC20, KPNA2, TOP2A	74	102	16881	6.70946	0.999965	0.347503	58.486
REACTOME_PATHWAY	R-HSA-380259:R-HSA-380259	3	3.79747	0.0735588	CDK1, PLK4, NEK2	59	70	9075	6.59201	0.999718	0.180776	57.6345
REACTOME_PATHWAY	R-HSA-75035:R-HSA-75035	2	2.53165	0.0740983	CCNB1, CDK1	59	12	9075	25.6356	0.999735	0.178098	57.9109
GOTERM_BP_DIRECT	GO:0071539~protein localization to centrosome	2	2.53165	0.0794382	STIL, AURKA	78	18	16792	23.9202	1	0.410697	69.2093
GOTERM_BP_DIRECT	GO:0000920~cell separation after cytokinesis	2	2.53165	0.0794382	CEP55, KIF20A	78	18	16792	23.9202	1	0.410697	69.2093
KEGG_PATHWAY	hsa00240:Pyrimidine metabolism	3	3.79747	0.0796597	TYMS, RRM1, TK1	33	101	6879	6.19172	0.93539	0.366544	51.5467
GOTERM_BP_DIRECT	GO:0070987~error-free translesion synthesis	2	2.53165	0.083664	RFC4, PCNA	78	19	16792	22.6613	1	0.423376	71.1609
GOTERM_BP_DIRECT	GO:0051276~chromosome organization	2	2.53165	0.083664	CDCA8, PTTG1	78	19	16792	22.6613	1	0.423376	71.1609
GOTERM_BP_DIRECT	GO:0042276~error-prone translesion synthesis	2	2.53165	0.083664	RFC4, PCNA	78	19	16792	22.6613	1	0.423376	71.1609
REACTOME_PATHWAY	R-HSA-174411:R-HSA-174411	2	2.53165	0.0859119	RFC4, PCNA	59	14	9075	21.9734	0.999933	0.200306	63.5681
REACTOME_PATHWAY	R-HSA-69166:R-HSA-69166	2	2.53165	0.0859119	PCNA, FEN1	59	14	9075	21.9734	0.999933	0.200306	63.5681
REACTOME_PATHWAY	R-HSA-69091:R-HSA-69091	2	2.53165	0.0859119	RFC4, PCNA	59	14	9075	21.9734	0.999933	0.200306	63.5681
REACTOME_PATHWAY	R-HSA-380270:R-HSA-380270	3	3.79747	0.0885961	CDK1, PLK4, NEK2	59	78	9075	5.91591	0.999951	0.201961	64.7527
REACTOME_PATHWAY	R-HSA-4419969:R-HSA-4419969	2	2.53165	0.091763	CCNB1, CDK1	59	15	9075	20.5085	0.999966	0.204561	66.1052
GOTERM_CC_DIRECT	GO:0005680~anaphase-promoting complex	2	2.53165	0.093997	CDC20, UBE2C	79	23	18224	20.0594	0.999992	0.249118	67.7431
GOTERM_BP_DIRECT	GO:0060045~positive regulation of cardiac muscle cell proliferation	2	2.53165	0.0962268	CCNB1, CDK1	78	22	16792	19.5711	1	0.466842	76.3048
REACTOME_PATHWAY	R-HSA-110312:R-HSA-110312	2	2.53165	0.0975773	RFC4, PCNA	59	16	9075	19.2267	0.999983	0.212447	68.4658

## Sheet: module2
The enriched GO terms and signaling pathways of Module 2 from the PPI network
Category	Term	Count	%	PValue	﹣Log(pvalue)	Genes	List Total	Pop Hits	Pop Total	Fold Enrichment	Bonferroni	Benjamini	FDR
GOTERM_CC_DIRECT	GO:0005576~extracellular region	7	77.7778	1.1284e-05	4.94754	CXCL1, HEBP1, IL1B, IL33, CXCL6, MMP1, PLAU	9	1610	18224	8.80386	0.000282061	0.000282061	0.00915455
REACTOME_PATHWAY	R-HSA-418594:R-HSA-418594	5	55.5556	3.38583e-05	4.47034	CXCL1, HEBP1, BDKRB1, GABBR2, CXCL6	9	246	9075	20.4946	0.000609274	0.000609274	0.024955
GOTERM_BP_DIRECT	GO:0006954~inflammatory response	4	44.4444	0.000587122	3.23127	CXCL1, IL1B, BDKRB1, CXCL6	9	379	16792	19.6916	0.0794727	0.0794727	0.691413
GOTERM_BP_DIRECT	GO:0006935~chemotaxis	3	33.3333	0.00142461	2.8463	CXCL1, CXCL6, PLAU	9	122	16792	45.8798	0.182098	0.0956209	1.67009
GOTERM_CC_DIRECT	GO:0005615~extracellular space	5	55.5556	0.0016332	2.78696	CXCL1, IL1B, IL33, CXCL6, PLAU	9	1347	18224	7.51629	0.0400398	0.0202244	1.31738
GOTERM_BP_DIRECT	GO:0032496~response to lipopolysaccharide	3	33.3333	0.00255404	2.59277	CXCL1, BDKRB1, CXCL6	9	164	16792	34.1301	0.302728	0.113251	2.97595
KEGG_PATHWAY	hsa05323:Rheumatoid arthritis	3	33.3333	0.00325903	2.48691	IL1B, CXCL6, MMP1	8	88	6879	29.3139	0.133793	0.133793	3.00788
GOTERM_MF_DIRECT	GO:0045236~CXCR chemokine receptor binding	2	22.2222	0.00425808	2.37079	CXCL1, CXCL6	9	9	16881	416.815	0.0818031	0.0818031	3.19554
GOTERM_BP_DIRECT	GO:0007165~signal transduction	4	44.4444	0.0141857	1.84815	CXCL1, IL1B, CXCL6, PLAU	9	1161	16792	6.42817	0.866614	0.395666	15.5311
GOTERM_BP_DIRECT	GO:0006955~immune response	3	33.3333	0.0158863	1.79898	CXCL1, IL1B, CXCL6	9	421	16792	13.2953	0.895436	0.363385	17.2365
GOTERM_BP_DIRECT	GO:0032755~positive regulation of interleukin-6 production	2	22.2222	0.0212432	1.67278	IL1B, IL33	9	45	16792	82.9235	0.951566	0.396249	22.4048
GOTERM_MF_DIRECT	GO:0008009~chemokine activity	2	22.2222	0.0229915	1.63843	CXCL1, CXCL6	9	49	16881	76.5578	0.37199	0.207529	16.2245
KEGG_PATHWAY	hsa04060:Cytokine-cytokine receptor interaction	3	33.3333	0.0232071	1.63438	CXCL1, IL1B, CXCL6	8	243	6879	10.6157	0.644115	0.403439	19.7223
GOTERM_BP_DIRECT	GO:0060326~cell chemotaxis	2	22.2222	0.0305571	1.51489	CXCL1, CXCL6	9	65	16792	57.4085	0.987421	0.464796	30.693
GOTERM_BP_DIRECT	GO:0070098~chemokine-mediated signaling pathway	2	22.2222	0.0333361	1.47709	CXCL1, CXCL6	9	71	16792	52.5571	0.991608	0.449851	33.004
REACTOME_PATHWAY	R-HSA-380108:R-HSA-380108	2	22.2222	0.050862	1.29361	CXCL1, CXCL6	9	59	9075	34.1808	0.609223	0.374879	31.9404
KEGG_PATHWAY	hsa05134:Legionellosis	2	22.2222	0.0536955	1.27006	CXCL1, IL1B	8	54	6879	31.8472	0.911822	0.554904	40.3306
KEGG_PATHWAY	hsa04621:NOD-like receptor signaling pathway	2	22.2222	0.0556357	1.25465	CXCL1, IL1B	8	56	6879	30.7098	0.919436	0.467236	41.4655
KEGG_PATHWAY	hsa04623:Cytosolic DNA-sensing pathway	2	22.2222	0.0633628	1.19817	IL1B, IL33	8	64	6879	26.8711	0.943877	0.437881	45.7963
GOTERM_BP_DIRECT	GO:0007186~G-protein coupled receptor signaling pathway	3	33.3333	0.0646583	1.18938	CXCL1, GABBR2, CXCL6	9	899	16792	6.22618	0.999919	0.649085	54.6005
KEGG_PATHWAY	hsa04610:Complement and coagulation cascades	2	22.2222	0.0681647	1.16644	BDKRB1, PLAU	8	69	6879	24.9239	0.955237	0.404127	48.3411
KEGG_PATHWAY	hsa05133:Pertussis	2	22.2222	0.073899	1.13136	IL1B, CXCL6	8	75	6879	22.93	0.965883	0.382803	51.24
GOTERM_MF_DIRECT	GO:0005125~cytokine activity	2	22.2222	0.0804425	1.09451	IL1B, IL33	9	176	16881	21.3144	0.813114	0.428268	47.1796
KEGG_PATHWAY	hsa05132:Salmonella infection	2	22.2222	0.0814978	1.08885	CXCL1, IL1B	8	83	6879	20.7199	0.976257	0.373471	54.8573
GOTERM_BP_DIRECT	GO:0042127~regulation of cell proliferation	2	22.2222	0.0848295	1.07145	CXCL6, PLAU	9	185	16792	20.1706	0.999996	0.713465	64.9091
KEGG_PATHWAY	hsa04064:NF-kappa B signaling pathway	2	22.2222	0.085277	1.06917	IL1B, PLAU	8	87	6879	19.7672	0.980197	0.353231	56.5655
KEGG_PATHWAY	hsa04750:Inflammatory mediator regulation of TRP channels	2	22.2222	0.0956014	1.01954	IL1B, BDKRB1	8	98	6879	17.5485	0.987982	0.357337	60.9416
GOTERM_CC_DIRECT	GO:0043005~neuron projection	2	22.2222	0.0994425	1.00243	BDKRB1, GABBR2	9	237	18224	17.0877	0.92709	0.582238	57.2495

## Sheet: module3
The enriched GO terms and signaling pathways of Module 3 from the PPI network
Category	Term	Count	%	P-value	Genes	List Total	Pop Hits	Pop Total	Fold Enrichment	Bonferroni	Benjamini	FDR
GOTERM_BP_DIRECT	GO:0030198~extracellular matrix organization	4	50	5.29542e-05	COL4A1, CD44, TGFBI, THBS1	8	196	16792	42.8367	0.0112162	0.0112162	0.0670359
GOTERM_BP_DIRECT	GO:0044344~cellular response to fibroblast growth factor stimulus	3	37.5	6.44384e-05	CCL2, CD44, CXCL8	8	30	16792	209.9	0.013632	0.00683941	0.0815685
GOTERM_CC_DIRECT	GO:0005576~extracellular region	6	75	9.64979e-05	BDNF, COL4A1, CCL2, TGFBI, CXCL8, THBS1	8	1610	18224	8.48944	0.00346806	0.00346806	0.0860363
GOTERM_BP_DIRECT	GO:0007155~cell adhesion	4	50	0.000654264	CCL2, CD44, TGFBI, THBS1	8	459	16792	18.2919	0.130123	0.0454048	0.825349
KEGG_PATHWAY	hsa05144:Malaria	3	37.5	0.000732173	CCL2, CXCL8, THBS1	7	49	6879	60.1662	0.0338389	0.0338389	0.693273
GOTERM_BP_DIRECT	GO:0071356~cellular response to tumor necrosis factor	3	37.5	0.000874051	CCL2, CXCL8, THBS1	8	110	16792	57.2455	0.169938	0.0454961	1.1012
REACTOME_PATHWAY	R-HSA-216083: Extracellular matrix organization	3	37.5	0.00129903	COL4A1, CD44, THBS1	7	86	9075	45.2243	0.033232	0.033232	1.06034
KEGG_PATHWAY	hsa04512:ECM-receptor interaction	3	37.5	0.00229492	COL4A1, CD44, THBS1	7	87	6879	33.8867	0.102359	0.0525609	2.15863
GOTERM_BP_DIRECT	GO:0001525~angiogenesis	3	37.5	0.00352858	CCL2, TGFBI, CXCL8	8	223	16792	28.2377	0.529009	0.139794	4.37749
GOTERM_BP_DIRECT	GO:0010759~positive regulation of macrophage chemotaxis	2	25	0.00457733	CCL2, THBS1	8	11	16792	381.636	0.62364	0.150297	5.6441
GOTERM_BP_DIRECT	GO:0036499~PERK-mediated unfolded protein response	2	25	0.00499256	CCL2, CXCL8	8	12	16792	349.833	0.655644	0.141267	6.14131
GOTERM_CC_DIRECT	GO:0031012~extracellular matrix	3	37.5	0.00523177	COL4A1, TGFBI, THBS1	8	296	18224	23.0878	0.172079	0.0900986	4.57085
GOTERM_BP_DIRECT	GO:0006954~inflammatory response	3	37.5	0.0098979	CCL2, CXCL8, THBS1	8	379	16792	16.6148	0.879819	0.232675	11.8352
GOTERM_MF_DIRECT	GO:0050840~extracellular matrix binding	2	25	0.0107336	TGFBI, THBS1	8	26	16881	162.317	0.307131	0.307131	9.05379
GOTERM_CC_DIRECT	GO:0005615~extracellular space	4	50	0.011248	CCL2, TGFBI, CXCL8, THBS1	8	1347	18224	6.76466	0.334504	0.126931	9.59697
GOTERM_BP_DIRECT	GO:0006955~immune response	3	37.5	0.0121142	CCL2, CXCL8, THBS1	8	421	16792	14.9572	0.925434	0.250578	14.302
GOTERM_BP_DIRECT	GO:0032570~response to progesterone	2	25	0.0161478	CCL2, THBS1	8	39	16792	107.641	0.968807	0.293021	18.6289
REACTOME_PATHWAY	R-HSA-380994:Metabolism of proteins	2	25	0.01642	CCL2, CXCL8	7	25	9075	103.714	0.349793	0.193646	12.6961
GOTERM_CC_DIRECT	GO:0009986~cell surface	3	37.5	0.0167896	CD44, THBS1, NT5E	8	542	18224	12.6089	0.456408	0.141346	14.0172
GOTERM_MF_DIRECT	GO:0008009~chemokine activity	2	25	0.0201462	CCL2, CXCL8	8	49	16881	86.1276	0.499408	0.292475	16.3874
REACTOME_PATHWAY	R-HSA-186797:Signal Transduction	2	25	0.0209771	COL4A1, THBS1	7	32	9075	81.0268	0.423746	0.167844	15.9584
GOTERM_BP_DIRECT	GO:0009612~response to mechanical stimulus	2	25	0.0243416	CCL2, THBS1	8	59	16792	71.1525	0.994747	0.379465	26.8058
GOTERM_MF_DIRECT	GO:0005518~collagen binding	2	25	0.0246206	CD44, TGFBI	8	60	16881	70.3375	0.571549	0.246123	19.686
GOTERM_BP_DIRECT	GO:0016525~negative regulation of angiogenesis	2	25	0.0255656	CCL2, THBS1	8	62	16792	67.7097	0.995979	0.368522	27.9602
GOTERM_BP_DIRECT	GO:0030593~neutrophil chemotaxis	2	25	0.0271956	CCL2, CXCL8	8	66	16792	63.6061	0.997185	0.363494	29.4713
GOTERM_BP_DIRECT	GO:0043154~negative regulation of cysteine-type endopeptidase activity involved in apoptotic process	2	25	0.0284166	CD44, THBS1	8	69	16792	60.8406	0.997846	0.355061	30.5841
GOTERM_BP_DIRECT	GO:0070098~chemokine-mediated signaling pathway	2	25	0.0292298	CCL2, CXCL8	8	71	16792	59.1268	0.998198	0.343774	31.3163
GOTERM_BP_DIRECT	GO:0071347~cellular response to interleukin-1	2	25	0.0292298	CCL2, CXCL8	8	71	16792	59.1268	0.998198	0.343774	31.3163
GOTERM_CC_DIRECT	GO:0005604~basement membrane	2	25	0.0299577	COL4A1, TGFBI	8	79	18224	57.6709	0.665447	0.196672	23.7601
GOTERM_BP_DIRECT	GO:0034976~response to endoplasmic reticulum stress	2	25	0.0308545	CXCL8, THBS1	8	75	16792	55.9733	0.998739	0.341125	32.7578
KEGG_PATHWAY	hsa05219:Bladder cancer	2	25	0.035245	CXCL8, THBS1	7	41	6879	47.9373	0.814817	0.43001	28.8803
REACTOME_PATHWAY	R-HSA-380108:Chemokine receptors bind chemokines	2	25	0.0383901	CCL2, CXCL8	7	59	9075	43.9467	0.638614	0.224659	27.4599
GOTERM_MF_DIRECT	GO:0005178~integrin binding	2	25	0.0427434	TGFBI, THBS1	8	105	16881	40.1929	0.773554	0.310172	31.8977
GOTERM_BP_DIRECT	GO:0071222~cellular response to lipopolysaccharide	2	25	0.0461735	CCL2, CXCL8	8	113	16792	37.1504	0.999958	0.446951	45.0436
GOTERM_BP_DIRECT	GO:0045766~positive regulation of angiogenesis	2	25	0.0469739	CXCL8, THBS1	8	115	16792	36.5043	0.999965	0.4341	45.6248
KEGG_PATHWAY	hsa04621:NOD-like receptor signaling pathway	2	25	0.047878	CCL2, CXCL8	7	56	6879	35.0969	0.900333	0.438127	37.2494
GOTERM_BP_DIRECT	GO:0006935~chemotaxis	2	25	0.0497711	CCL2, CXCL8	8	122	16792	34.4098	0.999981	0.435787	47.6115
GOTERM_BP_DIRECT	GO:0043524~negative regulation of neuron apoptotic process	2	25	0.0537548	BDNF, CCL2	8	132	16792	31.803	0.999992	0.444813	50.3257
KEGG_PATHWAY	hsa05131:Shigellosis	2	25	0.0545591	CD44, CXCL8	7	64	6879	30.7098	0.928416	0.409849	41.3091
GOTERM_BP_DIRECT	GO:0007050~cell cycle arrest	2	25	0.0573279	CXCL8, THBS1	8	141	16792	29.773	0.999997	0.45053	52.6494
GOTERM_MF_DIRECT	GO:0008201~heparin binding	2	25	0.0645009	CCL2, THBS1	8	160	16881	26.3766	0.896373	0.36453	44.3643
GOTERM_BP_DIRECT	GO:0001666~response to hypoxia	2	25	0.0695468	CCL2, THBS1	8	172	16792	24.407	1	0.50237	59.8602
GOTERM_BP_DIRECT	GO:0070374~positive regulation of ERK1 and ERK2 cascade	2	25	0.070722	CCL2, CD44	8	175	16792	23.9886	1	0.493008	60.4976
GOTERM_CC_DIRECT	GO:0005788~endoplasmic reticulum lumen	2	25	0.0714698	COL4A1, THBS1	8	192	18224	23.7292	0.930712	0.359121	48.3865
KEGG_PATHWAY	hsa05323:Rheumatoid arthritis	2	25	0.0743682	CCL2, CXCL8	7	88	6879	22.3344	0.97354	0.454117	52.002
GOTERM_CC_DIRECT	GO:0070062~extracellular exosome	4	50	0.0790609	CD44, TGFBI, THBS1, NT5E	8	2811	18224	3.24155	0.94844	0.345296	52.0304
KEGG_PATHWAY	hsa05142:Chagas disease (American trypanosomiasis)	2	25	0.0873812	CCL2, CXCL8	7	104	6879	18.8984	0.986398	0.458783	58.0414
KEGG_PATHWAY	hsa05146:Amoebiasis	2	25	0.0889971	COL4A1, CXCL8	7	106	6879	18.5418	0.987485	0.421666	58.7418

## Sheet: module4
The enriched GO terms and signaling pathways of Module 4 from the PPI network
Category	Term	Count	%	PValue		Genes	List Total	Pop Hits	Pop Total	Fold Enrichment	Bonferroni	Benjamini	FDR
GOTERM_CC_DIRECT	GO:0005615: extracellular space	5	62.5	0.000867349	3.06181	FBLN1, ACTA2, LUM, PRSS3, DCN	8	1347	18224	8.45583	0.0290717	0.0290717	0.76018
GOTERM_CC_DIRECT	GO:0070062: extracellular exosome	6	75	0.0013898	2.85705	FBLN1, ACTA2, LUM, PGM1, PRSS3, METTL7A	8	2811	18224	4.86233	0.0461855	0.0233657	1.2156
GOTERM_BP_DIRECT	GO:0030198: extracellular matrix organization	3	37.5	0.00273887	2.56243	FBLN1, LUM, DCN	8	196	16792	32.1276	0.2584	0.2584	3.04611
GOTERM_BP_DIRECT	GO:0010628: positive regulation of gene expression	3	37.5	0.00483621	2.31549	FBLN1, CD34, ACTA2	8	262	16792	24.0344	0.410468	0.23219	5.32129
GOTERM_CC_DIRECT	GO:0031012: extracellular matrix	3	37.5	0.00523177	2.28135	FBLN1, LUM, DCN	8	296	18224	23.0878	0.163348	0.0577164	4.50815
GOTERM_CC_DIRECT	GO:0005576: extracellular region	4	50	0.0183596	1.73614	FBLN1, LUM, PRSS3, DCN	8	1610	18224	5.65963	0.467424	0.145729	15.0372
GOTERM_MF_DIRECT	GO:0005518: collagen binding	2	25	0.0246206	1.6087	LUM, DCN	8	60	16881	70.3375	0.502424	0.502424	18.8236
GOTERM_BP_DIRECT	GO:0008217: regulation of blood pressure	2	25	0.0267883	1.57205	CD34, ACTA2	8	65	16792	64.5846	0.948168	0.627152	26.3814
GOTERM_MF_DIRECT	GO:0005201: extracellular matrix structural constituent	2	25	0.0274589	1.56132	FBLN1, LUM	8	67	16881	62.9888	0.541412	0.322809	20.7786
GOTERM_CC_DIRECT	GO:0043202: lysosomal lumen	2	25	0.0322012	1.49213	LUM, DCN	8	85	18224	53.6	0.671381	0.199542	25.0118
GOTERM_CC_DIRECT	GO:0005796: Golgi lumen	2	25	0.0363027	1.44006	LUM, DCN	8	96	18224	47.4583	0.715566	0.189045	27.7608
REACTOME_PATHWAY	R-HSA-3000178: Extracellular matrix organization	2	25	0.0485866	1.31348	LUM, DCN	7	75	9075	34.5714	0.726094	0.726094	33.5322
GOTERM_CC_DIRECT	GO:0015629~actin cytoskeleton	2	25	0.0808028	1.09257	ACTA2, PGM1	8	218	18224	20.8991	0.942997	0.335843	52.3335
GOTERM_CC_DIRECT	GO:0005578~proteinaceous extracellular matrix	2	25	0.0985249	1.00645	FBLN1, LUM	8	268	18224	17	0.970595	0.356493	59.8339
